# Supplementary material for: Hepatocyte growth factor pretreatment boosts functional recovery after spinal cord injury through human iPSC-derived neural stem/progenitor cell transplantation
Source: PubMed Central journal article supplement (PMC10577910; doi:10.1186/s41232-023-00298-y), 2023-10-16

# Supplemental Fig.2

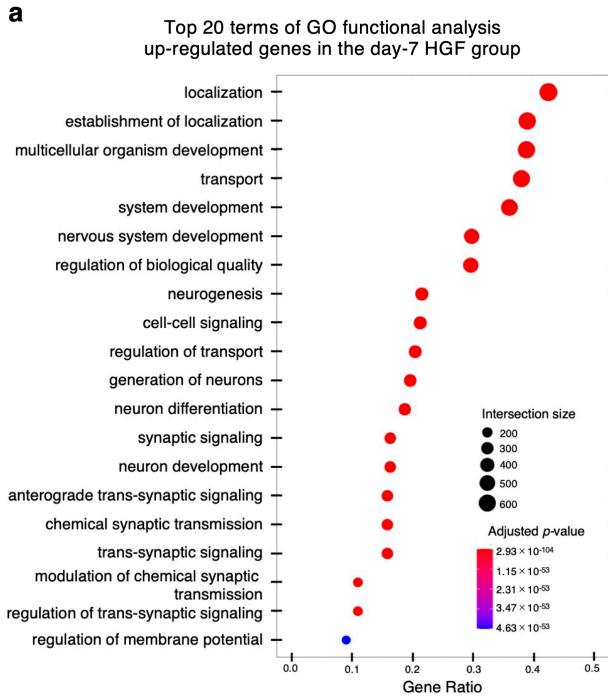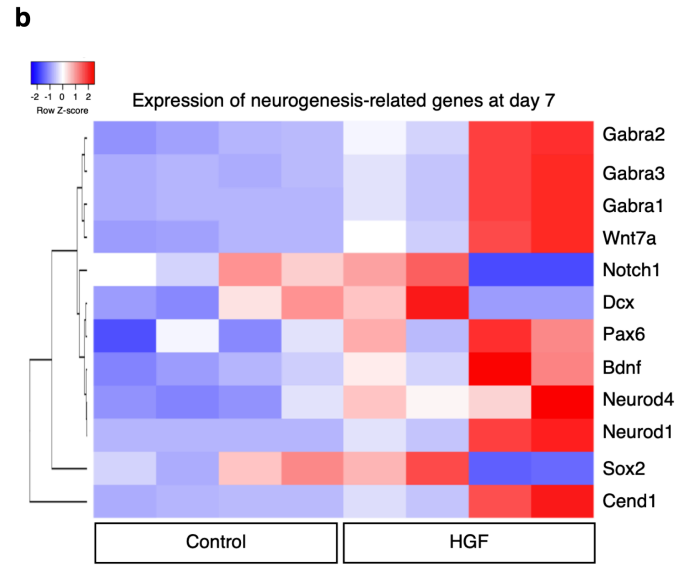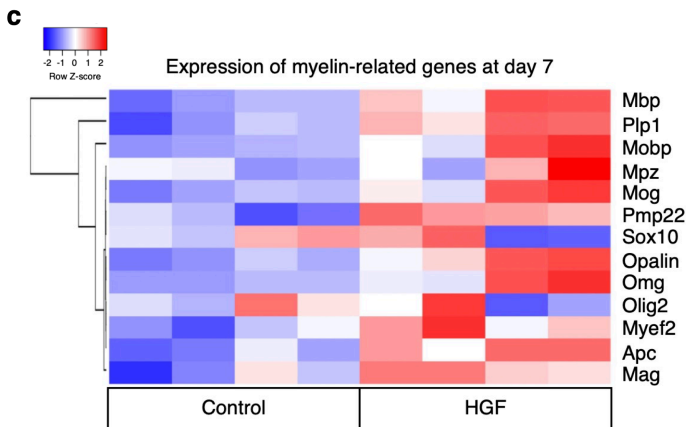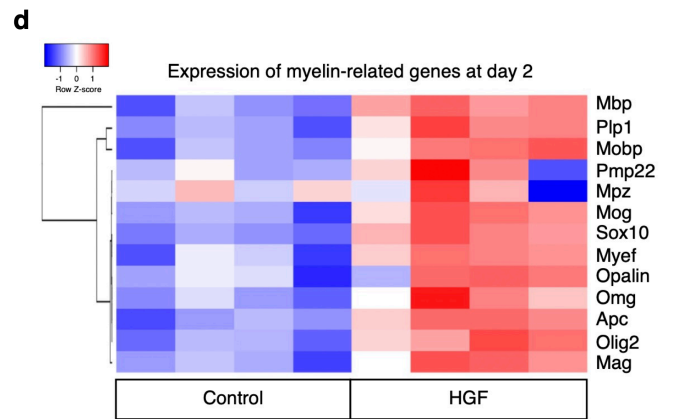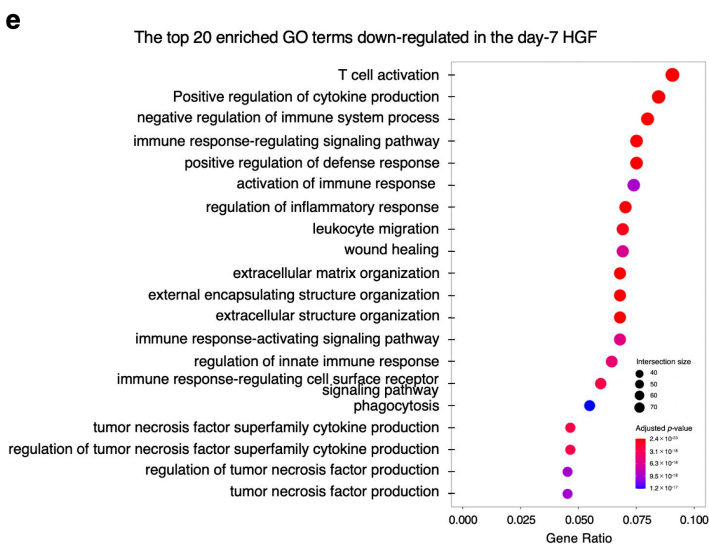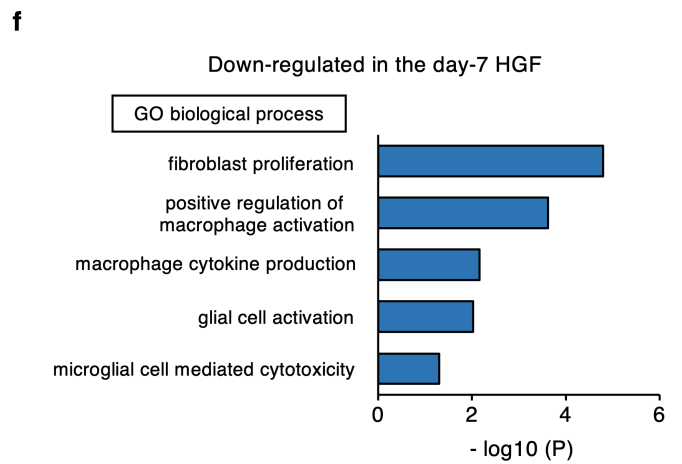

Supplement: 41232_2023_298_MOESM2_ESM.pdf [file 41232_2023_298_MOESM2_ESM.pdf]
